# Supplementary material for: Nomograms for predicting overall and cancer-specific survival of patients with chromophobe renal cell carcinoma after nephrectomy: a retrospective SEER-based study
Source: HighWire-hosted journal article supplement (doi:10.1136/bmjopen-2022-062129), 2022-09-01

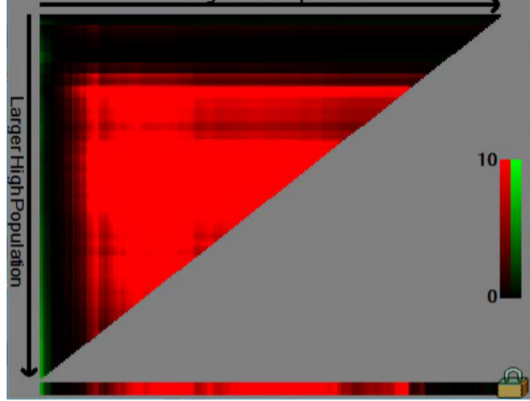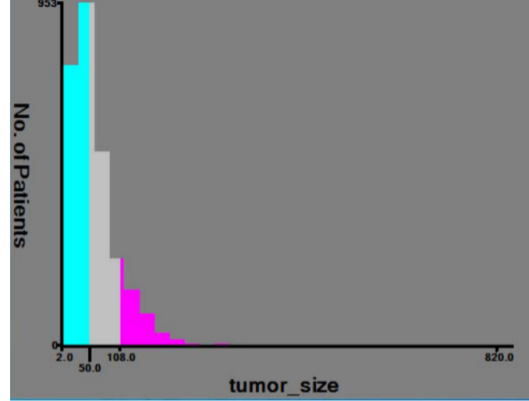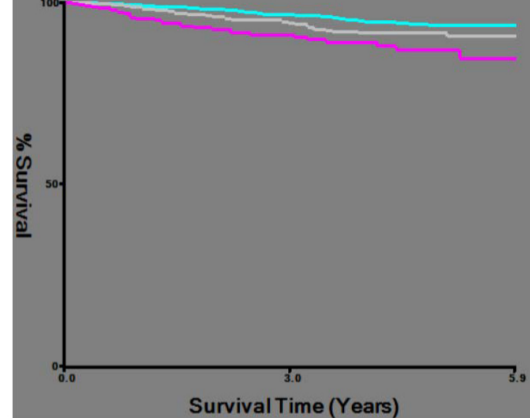

Supplement: bmjopen-2022-062129supp003_data_supplement.pdf [file bmjopen-2022-062129supp003_data_supplement.pdf]
