# Supplementary material for: Nomograms for predicting overall and cancer-specific survival of patients with chromophobe renal cell carcinoma after nephrectomy: a retrospective SEER-based study
Source: HighWire-hosted journal article supplement (doi:10.1136/bmjopen-2022-062129), 2022-09-01
Supplement: bmjopen-2022-062129supp004_data_supplement.pdf [file bmjopen-2022-062129supp004_data_supplement.pdf]

**Supplementary Table 1** Comparison of C-indexes between the nomogram and AJCC TNM stage in patients with chRCC undergoing surgery.

| Classification | OS                      |                            |                            | CSS                     |                            |                            |
|----------------|-------------------------|----------------------------|----------------------------|-------------------------|----------------------------|----------------------------|
|                | Training cohort         | Internal validation cohort | External validation cohort | Training cohort         | Internal validation cohort | External validation cohort |
|                | C-index (95%CI)         | C-index (95%CI)            | C-index (95%CI)            | C-index (95%CI)         | C-index (95%CI)            | C-index (95%CI)            |
| Nomogram       | 0.777<br>(0.728, 0.826) | 0.810<br>(0.747, 0.873)    | 0.863<br>(0.773, 0.953)    | 0.884<br>(0.829, 0.939) | 0.868<br>(0.772, 0.964)    | 0.862<br>(0.760, 0.964)    |
| AJCC TNM stage | 0.669<br>(0.604, 0.734) | 0.660<br>(0.568, 0.752)    | 0.667<br>(0.465, 0.869)    | 0.823<br>(0.743, 0.903) | 0.823<br>(0.721, 0.925)    | 0.759<br>(0.545, 0.973)    |

**Abbreviations:** AJCC, American Joint Committee on Cancer; C-index, concordance index; CI, confidence interval; chRCC, chromophobe renal cell carcinoma
